1

2

3

4

Historical trends of the ecotoxicological pesticide risk from the main grain crops in

5

Rolling Pampa (Argentina)

6

7

8

Ferraro, D.O.; Ghersa, F; de Paula, R.; Duarte Vera, A.C.; Pessah, S.

9

10

11

12

Universidad de Buenos Aires (UBA), Facultad de Agronomía, Cátedra de Cerealicultura.

13

UBA-CONICET, Instituto de Investigaciones Fisiológicas y Ecológicas Vinculadas a la

14

Agricultura (IFEVA).

15

16

17

\*Corresponding author

18

E-mail: [ferraro@agro.uba.ar](mailto:ferraro@agro.uba.ar)

19

20

21

## 22 **Abstract**

23           We showed the results of the first long-term analysis (1987-2019) of pesticide  
24 impact in the main agricultural area of Argentina. Using a clear and meaningful tool, based  
25 not only on acute toxicity but also on scaling up the results to total sown area, we identified  
26 time trends for both total pesticide impact and the ecoefficiency of modal pesticide profiles.  
27 By the end of the time series, soybean showed a pesticide impact four times greater than  
28 maize crop in the studied area. However, the time trend in the last years showed a  
29 sustainable pattern of pesticide use, with an improvement in the ecoefficiency. Oppositely,  
30 maize showed a relatively constant ecoefficiency value during most of the time series,  
31 suggesting a possible path towards an unsustainable cropping system. Findings from this  
32 study suggest that some efforts have to be made to improve the pest management decisions  
33 towards a more efficient pesticide profiles in maize crop and to keep improving the  
34 ecotoxicity pesticide profile in soybean crops because of its large sown area in the studied  
35 area.

36

## 37 **Introduction**

38           Modern agriculture includes the use of pesticides that have positively impacted  
39 cropping systems with a significant increase in yields [1]. However, the potential  
40 environmental costs of this intensification process has become a cause for concern [2].  
41 Particularly, rising pesticide use (herbicides, insecticides and fungicides) has been related  
42 to both human health and environmental degradation processes [3,4]. Moreover, the global  
43 increase of pesticide-resistant organism could lead to a potential rise in pesticide dosage  
44 required for the future pest management [5]. Thus, an understanding and a practical

45 assessment of the impact of agrochemical inputs are essential goals for designing  
46 sustainable cropping systems [6]. In this sense, a sustainability assessment can be made by  
47 using an indicator's fixed absolute values, or its temporal trajectory, as a proxy for  
48 forecasting the future state of a system [7]. The use of long-term approaches has furthered  
49 the understanding of the evolution of farming systems [8] and helped to infer future  
50 transitions toward sustainable or unsustainable system states [9]. However, data from long-  
51 term analyses of pesticide use in the recent literature are scarce [10-12].

52         There exists an array of indices to measure a pesticide's toxicity, which provide a  
53 hazard assessment of pesticide use with different approaches [13,14]. Almost all these  
54 indices are built by combining toxicological data relating to a target pesticide into a single  
55 score [11]. However, some indices have several flaws in terms of both transparent  
56 comparisons as well as weighting methods [15,16]. A comprehensive assessment requires  
57 quantitative indicators as well as system-oriented and diagnostic characteristics. The need  
58 to include the above-mentioned aspects in pesticide risk assessment implies the use of  
59 quantitative modeling. In addition, models should be able to integrate different types of  
60 information, which are not always expressed in the form of empirically based functional  
61 relationships but may represent a desirable state regarding the acceptance (or not) of a  
62 hazard level.[17].

63         This paper assessed changes in pesticide risk in the main cropping region of  
64 Argentina between 1987 and 2019 using a fuzzy-logic based ecotoxicity hazard indicator  
65 [6,18]. In recent decades, the main cropping regions of Argentina have been subject to an  
66 intensification process of crop production (i.e. higher yields), as determined by the adoption  
67 of no-tillage system [19], the increase in input use (e.g. pesticides and fertilizers), and  
68 technological adjustments in crop management (Manuel-Navarrete et al., 2009a; Viglizzo et

69 al., 2003). However, as in the main cropping systems worldwide, the potential impact as  
70 well, as the long-term dynamics due to recent technological changes, still remain  
71 controversial [20-22]. We analyzed a 32-year period of pesticide use in soybean and maize  
72 in the Rolling Pampa (Argentina). In addition, we used crop yields and sown area in order  
73 to assess, not only the impact per unit area, but also its possible impact associated with the  
74 sown area and the pesticide ecoefficiency (i.e yield achieved per unit of environmental  
75 hazard).

76

## 77 **Material and Methods**

### 78 **Study region**

79 We used data on pesticides, crop yield, and sown area from the Rolling Pampa, the  
80 main cropping region of Pampa Region [23]. A pesticide time series was built using the  
81 annual profile of pesticides used in the soybean and maize crops. Both crops contributed to  
82 85% and 78 % of total sown area at regional and country level, respectively [24]. The  
83 Rolling Pampa is the subregion of the Río de la Plata grasslands with more than 100 years  
84 of cropping history [25]. Traditionally a mixed grazing-crop area, the spread of no-tillage in  
85 the mid-1990s as well as the wheat–soybean double cropping and the lower cost of inputs  
86 (fertilizers, pesticides) led to a rapid expansion and intensification of agricultural  
87 production [26]. During the entire long-term period, the changes in the cropping systems of  
88 the studied area were mainly represented by three major technological changes: 1) the  
89 adoption of no-tillage system (NT); 2) the adoption of genetically-modified organisms  
90 (GMO); and 3) the start of systematic fertilization (F). No-tillage minimizes soil  
91 mechanical disturbance consequently reducing soil erosion and carbon loss processes, as it

92 leaves a greater percentage of soil covered with plant residues [27]. The change from the  
93 conventional tillage system to no-tillage system has also led to a shift in weed control  
94 strategy, from a tillage-based scheme to a pesticide-based management strategy. The GMO  
95 adoption started in 1996, when the first GMO crop introduced in Argentine agriculture was  
96 released, the glyphosate-tolerant soybeans (RR) [28]. The cultivation of RR soybeans,  
97 along with transgenic corn hybrids resistant to Lepidoptera (released in 1998) showed an  
98 explosive adoption rate among Pampean farmers. It is estimated that 99 % of soybeans and  
99 83% of maize crops in Argentina are GMO [29]

100

## 101 **The fuzzy-logic pesticide indicator (RIPEST)**

102 To assess long-term pesticide hazard dynamics we used RIPEST [6]. RIPEST is a  
103 simple fuzzy-based model [30] to estimate the ecotoxicological hazard of pesticides in  
104 agricultural systems. The model allows to assess the ecotoxicological hazard for 1) insects,  
105 2) mammals, and 3) the joint hazard of both impacts. The RIPEST structure comprises  
106 three main elements: 1) input variables, 2) fuzzy subsets for defining system processes or  
107 attributes based on input values and 3) logical nodes for weighting partial indications into a  
108 single system performance. The three input variables that describe the toxicity and the  
109 amount of active ingredients utilized in each field are: (1) oral acute lethal dose 50 for rats,  
110 (2) contact acute lethal dose 50 for bees; and (3) the dose applied for each pesticide  
111 application. Therefore, each active ingredient was characterized by means of two different  
112 toxicity values: (1) mammal toxicity and (2) insect toxicity. In order to assess the  
113 magnitude of the impact of each application, the values of mammal and insect toxicity were  
114 measured using the concept hazard quotient [31] defines as:

115

116  $T_{mam} [TUm] = D / LD50r$  (1)

117  $T_{ins} [TUi] = D / LD50b$  (2)

118 where,  $T_{mam}$  is the mammal toxicity of each pesticide application;  $T_{ins}$  the insect  
119 toxicity of each pesticide application;  $D$  the dose applied (g formulated product/ha);  $LD50r$   
120 the oral acute lethal dose 50 for rats (mg formulated product/1000 g rat weight);  $LD50b$  the  
121 contact acute lethal dose 50 for bees ( $\mu$ g formulated product/bee); and  $TUi$  and  $TUm$  the  
122 toxic units for insects and mammals, respectively. After calculating the  $T_{mam}$  and  $T_{ins}$  of  
123 single active ingredient formulations and mixtures, RIPEST use the sum of the toxic units  
124 (TU) of all the pesticides applied in each field order to calculate the overall toxicity value  
125 [32,33]:

126

127  $Sum T_{mam} [TUm] = \sum_n^i T_{mam}$  (3)

128  $Sum T_{ins} [TUi] = \sum_n^i T_{ins}$  (4)

129 where  $Sum T_{mam}$  is the mammal toxicity of all the pesticides applied;  $Sum T_{ins}$  the  
130 insect toxicity of all the pesticides applied; and  $n$  the number of pesticide applications on  
131 each field, during a single cropping cycle. Then,  $Sum T_{mam}$  and  $Sum T_{ins}$  values were  
132 used to calculate two different indexes: (1) mammal index (M) and (2) insect index (I),  
133 according with linear membership in a 0-100 scale. For this scaling, RIPEST uses the  
134  $T_{mam}$  and  $T_{ins}$  the highest value for the most toxic pesticides for mammals and insects [6].  
135 These pesticides are Zeta-cypermethrin 0.2 at 200g/ha and Methidathion 0.4 at 1500 g/ha.  
136 Both pesticides involve the highest toxicity registered in the Argentinean National Service  
137 for Sanitary and Quality of Agriculture and Food (SENASA 2018) and defines the value of  
138 I and M index = 100, respectively. Finally, in order to calculate the overall pesticide impact  
139 of pesticides, the (M) and (I) indexes are integrated by two fuzzy rules of the form IF

140 (antecedent)-THEN (consequent) to assemble the pesticide index (P) which indicates the  
141 overall impact of pesticide on each analyzed field. P index also range from 0 to 100. In  
142 RIPEST the rule node is calculated as follows:

143

144 R1) IF (M is 100) AND (I is 100) THEN P = 100

145 R2) IF (M is 100) AND (I is 0) THEN P = 90

146 R3) IF (M is 0) AND (I is 100) THEN P = 90

147 R4) IF (M is 0) AND (I is 0) THEN P = 0

148 where, R1 to 4 are fuzzy rules; M is the mammal index; I is the insect index; P is the  
149 Pesticide index. Finally, the values of all rules are integrated in a single crisp value by  
150 defuzzification process using the weighted average method [34].

151

## 152 **Data sources and analysis**

153 Data on pesticide use per hectare were defined following prescriptions for each crop  
154 during the whole studied period based on a national reference publication “Márgenes  
155 Agropecuarios” (<http://www.margenes.com>) for all years from 1987 to 2019. Crop yields  
156 and sown area were extracted from the Agricultural Estimates of the Ministry of Production  
157 and Labor of the Argentine Republic (<http://datosestimaciones.magyp.gob.ar/>) for the same  
158 time period. As the tillage system has shifted from conventional to no-tillage regime,  
159 different pesticide profiles were registered for each tillage systems in each crop in the time  
160 interval 2002-2007 (soybean) and 2002-2012 (maize). During this period, total values were  
161 calculated using data of sown area under these two different tillage systems [35,36]. Before  
162 and after these periods each crop under different tillage systems share the same pesticide  
163 profile. Final P index value is expressed in a 0-100 scale and represents the

164 ecotoxicological hazard of pesticides applied per hectare. In order to scale the P values for  
165 the total sown area, we represent the P index using units (units. ha<sup>-1</sup>). The pesticide  
166 ecoefficiency (i.e yield achieved per unit of environmental hazard) was calculated as the  
167 cost–benefit ratio of the yield to environmental impacts. To detect possible monotonic  
168 trends in the time series we used the Mann-Kendall test [37]. Pesticide data used in the  
169 analysis have been provided as supplementary information.

170

## 171 **Results**

172 Pesticide index (P) showed both different values and time trends in soybean and  
173 maize crops (Fig. 1). Soybean showed the highest P value at the beginning of the studied  
174 period and decreased until the early-2000, while maize crop started the time series showing  
175 extremely low P values (Fig. 1).

176

177 **Fig 1. P index [P units. ha<sup>-1</sup>] for soybean (solid line) and maize (broken line) cropping**  
178 **systems from 1987 to 2019.** Time series also shows temporal trend of P index for cropping  
179 systems under conventional tillage (CT: closed symbols) and no-tillage (NT: open symbols)  
180 for both crops. Mann-Kendall test for monotonic trend: Soybean CT (tau = -0.06, P = 0.69);  
181 Soybean NT (tau = -0.33, P = 0.06). Maize CT (tau = 0.63, P = 0.002); Maize NT (tau = -  
182 0.53, P = 0.006).

183

184 However, by the end of the period, the soybean crop showed a remarkable P index  
185 decrease, resulting in similar values for both crops in the last year analyzed (Fig. 1). The  
186 high ecotoxicological hazard per hectare (i.e P index) that the soybean crop exhibited



187 during most of the time series was enhanced by the large sown area occupied by this crop  
188 in the studied area (Fig. 2).

189

190 **Fig. 2. Total sown area (Mha) under soybean (upper panel) and maize (lower panel)**

191 **crops from 1987 to 2019.** The dotted lines show the evolution of area under no-tillage

192 during the studied period. The vertical lines define the time period when the sown area of

193 each crop exhibited differential pesticide usage according to the tillage system (CT and

194 NT). Mann-Kendall test for monotonic trend of total area: Soybean ( $\tau = 0.48$ ,  $P < 0.001$ );

195 Maize NT ( $\tau = -0.02$ ,  $P = 0.79$ ).

196

197 The increase in the sown area with soybean crop was significant in the period 1987-

198 2019, something that did not occur with corn, which exhibited increases and decreases

199 without a defined pattern (Fig. 2). When P index values were scaled by sown area of each

200 crop, soybean values were one order of magnitude higher than maize in most of the period

201 studied (Fig. 3).

202

203 **Fig. 3. Total P index units [Million of units] under soybean (upper panel) and maize**

204 **(lower panel) crops.** Mann-Kendall test for monotonic trend: Soybean ( $\tau = 0.16$ ,  $P =$

205  $0.20$ ); Maize ( $\tau = 0.71$ ,  $P < 0.001$ ). The vertical lines define the time period when the

206 sown area of each crop exhibited differential pesticide usage according to the tillage system

207 (CT and NT).

208

209 There were also trend differences between crops as soybean showed no significant

210 increase in total P units and maize exhibited a significant increase of P units from 1987 to

211 2019. The decreasing trend observed in soybean P index (Fig. 1) explained the gap  
212 narrowing between the impacts of soybean and maize, which still remained wide by the end  
213 of the period, as soybean and maize showed 59 M and 13 M units, respectively (Fig. 3).  
214 Both crops showed a monotonic increasing trend in total yield in the studied area (Fig. 4).  
215

216 **Fig. 4. Total yield (Mt) under soybean (solid line) and maize (broken line) crops from**  
217 **1987 to 2019.** Mann-Kendall test for monotonic trend: Soybean ( $\tau = 0.61$ ,  $P < 0.001$ );  
218 Maize ( $\tau = 0.47$ ,  $P < 0.001$ ).

219  
220 However, when both total impact (Fig. 3) and yield (Fig. 4) were integrated in a  
221 single ecoefficiency indicator the time trends were different between crops (Fig. 5).  
222 Soybean crop showed a significant positive trend in ecoefficiency, with a remarkable  
223 improvement from the early-2010 (Fig. 5). Oppositely, maize crop showed an overall  
224 negative trend in ecoefficiency, mainly related to a significant decrease when the pesticide  
225 profile of no-tillage began to be considered (Fig. 5).

226  
227 **Fig. 5. Ecoefficiency (t/P) of soybean (upper panel) and maize (lower panel) crops**  
228 **from 1987 to 2019.** Ecoefficiency is based upon the ratio of crop yield to P index. Mann-  
229 Kendall test for monotonic trend: Soybean ( $\tau = 0.31$ ,  $P = 0.004$ ); Maize ( $\tau = -0.44$ ,  $P <$   
230  $0.001$ ). The vertical lines define the time period when the sown area of each crop exhibited  
231 differential pesticide usage according to the tillage system (CT and NT).

232  
233 In a relative time-trend analysis of both total pesticide impact (Fig. 4) and the  
234 ecoefficiency (Fig. 5) using a common base (1987=1), soybean crop showed no significant

235 trend during the studied period for either measure, but maize showed an almost six-fold  
 236 increase in total impact, measured as the total number of P units (Fig. 6).

237

238 **Fig. 6. Relative values (Base 1987 =1) of Total P index units (Total P index units\_rel:**

239 **upper panel) and Ecoefficiency (Ecoefficiency\_rel: lower panel) of soybean (solid**

240 **lines) and maize (broken lines) crops from 1987 to 2019.** Mann-Kendall test for

241 monotonic trend: Soybean Total P index units\_rel ( $\tau = 0.16$ ,  $P = 0.20$ ); Maize Total P

242 index units\_rel ( $\tau = 0.70$ ,  $P < 0.001$ ); Soybean Ecoefficiency\_rel ( $\tau = 0.31$ ,  $P = 0.004$ );

243 Maize Ecoefficiency\_rel ( $\tau = -0.44$ ,  $P < 0.001$ ). The vertical lines define the time period

244 when the sown area of each crop exhibited differential pesticide usage according to the

245 tillage system (CT and NT).

246 When ecoefficiency was analyzed in relative terms, soybean and maize crops not  
 247 only showed opposite time trends (Fig. 5) but also different magnitudes in these changes.

248 As maize showed a negative trend, in relative terms, reaching a relative value of 0.52 by the  
 249 end of the period, ecoefficiency of the soybean crop remarkably increased, showing a

250 relative final value of 7.22 in 2019 (Fig. 6). Pesticide profiles in both crops showed

251 noticeable changes in the 1987-2019 period in the quantity of active ingredient used as well

252 as in the specific toxicity of the pesticides (Tables 1 and 2).

253 **Table 1. Toxic units for mammals (TUm) and insects (TU<sub>i</sub>) of pesticides used in**  
 254 **soybean crop for the years 1987, 1993, 1999, 2007, 2013 and 2019. TS: Tillage system**

| TS | Year | a.i.                        | % a.i.     | Dose (g/ha) | TUm    | TU <sub>i</sub> |
|----|------|-----------------------------|------------|-------------|--------|-----------------|
| CT | 1987 | Parathion-methyl            | 1          | 500         | 250.00 | 12500           |
|    |      | Trifluralin                 | 0.48       | 2000        | 0.19   | 9.60            |
|    |      | Glyphosate                  | 0.36       | 500         | 0.09   | 1.80            |
|    |      | Total                       |            | 3000        | 250.3  | 12511           |
|    | 1993 | Chlorpyrifos + Cypermethrin | 0.5 + 0.05 | 700         | 5.42   | 7453            |
|    |      | Haloxyfop-P-methyl          | 0.52       | 350         | 0.61   | 1.82            |
|    |      | Bentazone                   | 0.6        | 800         | 0.34   | 2.4             |
|    |      | Trifluralin                 | 0.48       | 2000        | 0.19   | 9.60            |
|    |      | 2,4-DB                      | 0.76       | 20          | 0.01   | 0.15            |
|    |      |                             |            |             |        |                 |

|    |      |                                |               |      |       |       |
|----|------|--------------------------------|---------------|------|-------|-------|
|    |      | <i>Total</i>                   |               | 3870 | 6.577 | 7467  |
|    | 1999 | Endosulfan + Deltamethrin      | 0.32 + 0.008  | 500  | 4.26  | 2687  |
|    |      | Imazethapyr                    | 0.1           | 800  | 0.02  | 0.80  |
|    |      | Propaquizafop                  | 0.1           | 350  | 0.01  | 0.18  |
|    |      | <i>Total</i>                   |               | 1650 | 4.28  | 2688  |
|    | 2007 | Chlorpyrifos                   | 0.48          | 1400 | 10.18 | 11389 |
|    |      | Glyphosate                     | 0.747         | 2000 | 0.75  | 14.9  |
|    |      | Cypermethrin                   | 0.25          | 150  | 0.13  | 1630  |
|    |      | Pyraclostrobin                 | 0.133 + 0.05  | 500  | 0.02  | 0.92  |
|    |      | <i>Total</i>                   |               | 4050 | 11.08 | 13036 |
| NT | 2007 | Chlorpyrifos                   | 0.48          | 1400 | 10.18 | 11389 |
|    |      | 2,4-D                          | 1             | 500  | 1.67  | 5.0   |
|    |      | Glyphosate                     | 0.36          | 4000 | 0.72  | 14.4  |
|    |      | Glyphosate                     | 0.747         | 1500 | 0.56  | 11.2  |
|    |      | Cypermethrin                   | 0.25          | 150  | 0.13  | 1630  |
|    |      | Deltamethrin                   | 0.1           | 50   | 0.06  | 3333  |
|    |      | Pyraclostrobin                 | 0.133 + 0.05  | 500  | 0.02  | 0.92  |
|    |      | <i>Total</i>                   |               | 8100 | 13.34 | 16385 |
|    | 2013 | 2,4-D                          | 1             | 500  | 1.67  | 5.0   |
|    |      | Glyphosate                     | 0.36          | 4000 | 0.72  | 14.4  |
|    |      | Imidacloprid + Beta-cyfluthrin | 0.1 + 0.0125  | 750  | 0.69  | 10300 |
|    |      | Glyphosate                     | 0.747         | 1500 | 0.56  | 11.2  |
|    |      | Lambda-cyhalothrin             | 0.05          | 25   | 0.02  | 32.8  |
|    |      | Pyraclostrobin                 | 0.133 + 0.05  | 500  | 0.02  | 0.92  |
|    |      | Methoxyfenozide                | 0.24          | 120  | 0.01  | 0.29  |
|    |      | Metsulfuron-methyl             | 0.6           | 8    | 0.00  | 0.10  |
|    |      | <i>Total</i>                   |               | 7403 | 3.69  | 10365 |
|    | 2019 | 2,4-D                          | 1             | 500  | 1.67  | 5.0   |
|    |      | Glyphosate                     | 0.36          | 4000 | 0.72  | 14.4  |
|    |      | Glyphosate                     | 0.747         | 1500 | 0.56  | 11.2  |
|    |      | Thiamethoxam                   | 0.141 + 0.106 | 200  | 0.40  | 1732  |
|    |      | Lambda-cyhalothrin             | 0.05          | 125  | 0.11  | 164.4 |
|    |      | Pyraclostrobin                 | 0.133 + 0.05  | 500  | 0.02  | 0.92  |
|    |      | Diclosulam + Halauxifen-methyl | 0.58 + 0.12   | 43   | 0.01  | 1.05  |
|    |      | Chlorantraniliprole            | 0.2           | 30   | 0.00  | 1.50  |
|    |      | Metsulfuron-methyl             | 0.6           | 8    | 0.00  | 0.10  |
|    |      | <i>Total</i>                   |               | 6906 | 3.485 | 1931  |

255 TS: Tillage system

256 **Table 2. Toxic units for mammals (TU m) and insects (TU i) of pesticides used in**  
 257 **maize crop for the years 1987, 1993, 1999, 2007, 2013 and 2019. TS: Tillage system**

| TS | Year | a.i.         | % a.i. | Dose (g/ha) | TUm  | TUi   |
|----|------|--------------|--------|-------------|------|-------|
| CT | 1987 | Alachlor     | 0.48   | 1200        | 0.62 | 36.0  |
|    |      | Atrazine     | 0.9    | 1100        | 0.53 | 9.90  |
|    |      | <i>Total</i> |        | 2300        | 1.15 | 45.9  |
|    | 1993 | Alachlor     | 0.48   | 3500        | 1.81 | 105.0 |
|    |      | Atrazine     | 0.9    | 3500        | 1.69 | 31.5  |
|    |      | <i>Total</i> |        | 7000        | 3.49 | 136.5 |
|    | 1999 | Acetochlor   | 0.84   | 2000        | 0.87 | 8.40  |
|    |      | Atrazine     | 0.9    | 1000        | 0.48 | 9.00  |

|               |      |                   |       |       |        |       |
|---------------|------|-------------------|-------|-------|--------|-------|
|               |      | <i>Total</i>      |       | 3000  | 1.35   | 17.4  |
|               | 2007 | Atrazine          | 0.5   | 4000  | 1.07   | 20.0  |
|               |      | Acetochlor        | 0.84  | 2000  | 0.87   | 8.40  |
|               |      | Cypermethrin      | 0.25  | 150   | 0.13   | 1630  |
|               |      | <i>Total</i>      |       | 6150  | 2.07   | 1658  |
| <b>NT</b>     | 2007 | 2,4-D             | 1     | 500   | 1.67   | 5.0   |
|               |      | Atrazine          | 0.5   | 3000  | 0.80   | 15.0  |
|               |      | Acetochlor        | 0.84  | 1600  | 0.70   | 6.72  |
|               |      | Glyphosate        | 0.36  | 2000  | 0.36   | 7.20  |
|               |      | Cypermethrin      | 0.25  | 150   | 0.13   | 1630  |
|               |      | <i>Total</i>      |       | 7250  | 3.66   | 1664  |
|               | 2013 | 2,4-D             | 1     | 500   | 1.67   | 5.0   |
|               |      | Epoxiconazole     | 0.96  | 1300  | 1.04   | 11.3  |
|               |      | Glyphosate        | 0.36  | 4500  | 0.81   | 16.2  |
|               |      | Atrazine          | 0.9   | 1500  | 0.72   | 13.5  |
|               |      | Glyphosate        | 0.679 | 1500  | 0.51   | 10.1  |
|               |      | Atrazine          | 0.9   | 1000  | 0.48   | 9.0   |
|               |      | Gamma-cyhalothrin | 0.15  | 20    | 0.05   | 600   |
|               |      | Picloram          | 0.24  | 80    | 0.00   | 0.19  |
|               |      | <i>Total</i>      |       | 10400 | 5.29   | 665.4 |
|               | 2019 | 2,4-D             | 1     | 500   | 1.67   | 5.00  |
|               |      | Epoxiconazole     | 0.96  | 1300  | 1.04   | 11.3  |
|               |      | Glyphosate        | 0.36  | 4500  | 0.81   | 16.2  |
|               |      | Atrazine          | 0.9   | 1500  | 0.72   | 13.5  |
|               |      | Glyphosate        | 0.679 | 1500  | 0.51   | 10.1  |
| Atrazine      |      | 0.9               | 1000  | 0.48  | 9.0    |       |
| Picloram      |      | 0.24              | 80    | 0.00  | 0.19   |       |
| S-metolachlor |      | 0.12              | 80    | 0.00  | 400.0  |       |
| <i>Total</i>  |      |                   | 10460 | 5.24  | 460.29 |       |

258 TS: Tillage system

259 Results from the studied period in the entire database of pesticide usage in soybean  
260 showed that in the first 20 years (1987-2007) the amount of pesticides applied ranges  
261 between 3000 and 4000 g/ha (Table 1). However, as a result of the shift to no-tillage system  
262 the applied dose doubled up to 8100 g/ha and has remained almost unchanged until 2019.  
263 The same pattern of increase in the amount of pesticide use was observed in maize crops,  
264 ranging from 2300 g/ha in 1987 up to 10460 g/ha by 2019 (Table 2). Regarding the  
265 ecotoxicity hazard of the pesticides used, the soybean showed no important changes in the  
266 total toxic units for insects (TUi) until the end of the period studied when final values were  
267 one order of magnitude lower than the rest of the database (Table 1). The mammal

268 ecotoxicity assessment, measured in toxic units for mammals (TUm), showed the highest  
269 toxicity values at the beginning of the time series, mainly due to the used of an extremely  
270 toxic compound (Parathion-methyl) that was banned by 1990s. In the following years, the  
271 total number of TUm remained in the range of 5-13 TUm, until Chlorpyrifos and  
272 Endosulfan were replaced by less toxic insecticides (Table 1). In maize, the main change in  
273 insect ecotoxicity (TUi) was observed because of the adoption of insecticides in the  
274 analyzed pesticide profiles (Table 2). However, pesticide usage data showed a breakpoint  
275 toward lower doses and less toxic compounds in maize which resulted in fewer toxic units  
276 for insects by the end of the time series. Finally, mammal toxicity of pesticides usage in  
277 maize crop showed a constant and positive increase from 1.15 TUm, for the pesticide profile  
278 in 1987, up to 5.24 TUm in 2019 (Table 2).

279

## 280 **Discussion**

281       Agricultural intensification relies on ecosystem assessment in order to move  
282 towards sustainable farming systems. However, this assessment should include both present  
283 and near future effects on key ecosystem processes in order to infer ecosystem time trends  
284 [38]. Regarding pesticide use, long-term monitoring represents a critical step for  
285 sustainability assessment as data on pesticide use remains scattered and not necessarily  
286 publicly available [39]. This is often the situation in developing countries where data on  
287 both pesticide monitoring and actual amount of pesticides use at national and regional are  
288 difficult to find [40]. In this paper, we cope with this problem by using standard pesticide  
289 regimes registered in one of the main cropping areas of Argentina as a proxy of the actual  
290 use of pesticides. This assumption may imply a significant caveat to be considered when  
291 analyzing our results, particularly when this regime is scaled-up using the sown area for

292 assessing an overall pesticide hazard in maize and soybean crops. In this sense, the lack of  
293 direct information on the use of pesticides could incorporate some bias in the observed  
294 absolute values. However, both the data integrity on pesticide use regimes and the  
295 evolution of the sown area in both crops and under different tillage systems allows  
296 evaluating the observed trends and using them as reliable indicators of long-term change in  
297 the systems studied [41].

298 Environmental assessment should not only include the spatial and temporal  
299 dimensions, but it should also rely on meaningful metrics [42]. Concerning pesticide use,  
300 there are plenty of indicators based in commercialized volume, dose applied, exposure or  
301 several ecotoxicity values [43]. However, indicators based solely on the weight of pesticide  
302 applied can result in ambiguous or incorrect conclusions, because pesticides used in  
303 cropping systems involve a variety of toxicity profiles. This has led to a switch in current  
304 risk assessments from quantity-based [44] to toxicity-based indicators [45]. In this work,  
305 we used a toxicity-based indicator which follows a hazard quotient approach [12,46]. The  
306 selected indicator is free from most of the previous concerns about the environmental  
307 impact quotient (EIQ) developed previously [47]. Most of these concerns are related to  
308 numerical calculations with ordinal values, the undermining of important pesticide risk  
309 factors, the lack of supporting data for assigning some partial risk values and the strong  
310 correlation between field EIQ and pesticide use rate [12,15,16]. The acute toxicity on insect  
311 and mammals were integrated using fuzzy logic as a tool. The fuzzy logic approach has  
312 been previously used in pesticide assessment [18,48] and is very useful in order to develop  
313 a continuum process of ecosystem monitoring. The explicit nature of both membership  
314 functions and fuzzy if-then rules set up a conceptual assessment framework that could be  
315 easily improved in the future by the inclusion of new rules for weighting indicator scores in

316 different situations [49]. This is a critical issue when modeling and building sustainability  
317 indicators as its characterization should be literal, and system-oriented [38]. Moreover, the  
318 scores derived from RIPEST involve the distance between observed values and some  
319 reference values rather than an absolute value, which rarely reveals whether the impact of a  
320 system is acceptable or not [50].

321 Our study is, as far as we know, the first long-term analysis of pesticide risk in  
322 cropping systems of Argentina. Previous long-term analysis showed that pesticide impact  
323 decreased in UK from 1992-2008, but also that this pattern is crop-dependent, with an  
324 initial risk decrease followed by a long stabilized period [11]. Data from herbicide use in  
325 USA from 1990-2015 showed that acute toxicity decreased for the six main crops;  
326 particularly both maize and soybean showed a decrease in acute toxicity per hectare [12].  
327 Our results did not show a common time trend in ecotoxicity risk among crops. Results  
328 showed two temporal dynamics of pesticide impact, which were related to the analyzed  
329 crop. Soybean showed high temporal variability due to both technological changes  
330 associated to tillage system shift and a national ban of highly toxic compounds [51-53].  
331 Pesticide regulations shows differences in Argentina in relation to EU countries mainly  
332 associated with the timing of prohibition and restriction (Iturburu *et al.*, 2019). However,  
333 several organophosphorus, all organochlorine pesticides (OCPs) have been restricted since  
334 1991 and totally banned by 1998 [51,52,54]. By this time, the observed soybean time-trend  
335 showed a significant decrease both per area and total impact due to pesticide profiles as  
336 well as by the end of the studied period when impact reduction was mainly due to lower  
337 applied doses.

338 The Mann-Kendall statistical test only evaluates monotonic trends over the entire  
339 32-year period. However, partial trends may be important, even where the overall trend is



340 non-significant [12]. A partial positive trend in pesticide impact was observed both in  
341 soybean and maize crops during the period of no-tillage adoption. Pesticide risk increased  
342 in this period due to the double effect of the increase in the sown area and the shift towards  
343 systems with greater use of pesticides. When tillage is reduced, farmers become more  
344 reliant on other weed and pest control practices, and at least some of the widespread  
345 increase in pesticide use could be attributable to adoption of conservation tillage practices  
346 [55]. However, by the end of the time series (the period when no-tillage was fully adopted)  
347 the observed trend was different between crops. Although the sown area increased in both  
348 crops, total pesticide impact in these last years decreased in soybean because of a  
349 significant low pesticide use in the modal profiles. Otherwise, maize kept the toxicity  
350 profiles relatively constant during half of the time series, but the sown area increment  
351 resulted in a significant partial incremental pesticide impact trend. Soybean production  
352 showed a continuous improvement in its toxicity indicators, something opposite to what  
353 was observed in the corn crop. Maize has a continuous increased in ecotoxicity risk,  
354 boosted mainly by a higher dose trend. This result seems to be contrary to technological  
355 changes in maize, mainly represented by the incorporation of the genetic modification that  
356 confers resistance to insects (i.e. Bt-corn) as early as 1996 [56]. However, around the same  
357 period, herbicide resistance has been extensively documented in this productive area  
358 [57,58], which led to an increase in the use of herbicides [59]. This process was also  
359 enhanced by the relative increase in rotation of winter fallows without crop coverage due to  
360 the noticeable reduction of sown area with wheat and barley [60].

361 Environmental monitoring should encourage pesticide use changes towards more  
362 sustainable trajectories. However, the adoption of these changes depends on the way the  
363 observed trends are communicated and highlighting potential tradeoffs in pesticide

364 assessment by using both impact and return metrics [61]. Ecoefficiency is a key indicator  
365 for showing an improved measure of sustainability because it links environmental impacts  
366 directly with some kind of economic performance, possibly leading towards sustainable  
367 development [62]. Time-trends of soybean showed a significant increase in ecoefficiency,  
368 particularly in the last years analyzed. Soybean dependence on herbicides has risen as a  
369 result of weed-related problems. However, RIPEST is sensible to acute toxicity defined  
370 mainly for highly toxic insecticides, and the modal pesticide soybean profiles showed a  
371 constant reduction not only in the number but also in the acute toxicity of insecticides used.  
372 Oppositely, the maize crop did not show improvements in ecoefficiency. As we previously  
373 mentioned, during this period some innovations have been adopted to increase yield and  
374 reduce the risk of crop loss [56]. These objectives were met as shown by the constant  
375 increase in total yield, remarkably during the last 10 years of the data analyzed. However,  
376 these improvements were not fully reflected in the ecoefficiency. This pattern is clearer  
377 when the ecoefficiency values are expressed in a common base, related to initial values.  
378 The constant value of relative ecoefficiency in maize crop is showing a possible path  
379 towards an unsustainable cropping system.

380 Finally, some areas for improvement in pesticide impact assessment has should not  
381 be overlooked. We reported data on environmental impact based on ecotoxicity. However,  
382 there are some issues to consider such as pesticide fate and transport, which is especially  
383 critical when assessing sensitive areas such watersheds and the urban-rural interface.  
384 However, data on long-term ecotoxicity trends, both on total impact and when using the  
385 ecoefficiency concept, should help to push for sustainable intensification by identifying  
386 negative trends and highlighting a potential tradeoff between crop productivity and  
387 environmental impact. The ultimate challenge is to reinforce high crop yield time-trends

388 while simultaneously incentivizing the efficient use of pesticides to minimize this potential  
389 tradeoff between crop productivity and environmental impact.

390

## 391 **Acknowledgements**

392 This material is based upon work supported by the University of Buenos Aires  
393 (UBA); the National Council for Scientific Research (CONICET); and the National Agency  
394 for Science Promotion (ANPCyT) of Argentina (PICT 2016-3216)

395

## 396 **Supporting Information**

397 **S1 Table. Data for pesticide use**

398 **S2 Table. Data for sown area and yields**

399

## 400 **References**

401 1. Foley JA, Ramankutty N, Brauman KA, Cassidy ES, Gerber JS, et al. (2011) Solutions for a  
402 cultivated planet. *Nature* 478: 337.

403 2. Pretty J (2008) Agricultural sustainability: concepts, principles and evidence. *Philosophical*  
404 *Transactions of the Royal Society B: Biological Sciences* 363: 447-465.

405 3. Imfeld G, Vuilleumier S (2012) Measuring the effects of pesticides on bacterial communities in  
406 soil: a critical review. *European Journal of Soil Biology* 49: 22-30.

- 407 4. Li Z, Jennings A (2017) Worldwide Regulations of Standard Values of Pesticides for Human  
408 Health Risk Control: A Review. *International journal of environmental research and public*  
409 *health* 14: 826.
- 410 5. Hillocks RJ (2012) Farming with fewer pesticides: EU pesticide review and resulting challenges  
411 for UK agriculture. *Crop Protection* 31: 85-93.
- 412 6. Ferraro DO, Duarte Vera AC, Pessah S, Ghera F (2020) Environmental Risk Indicators for  
413 Weed Management: A Case Study of Ecotoxicity Assessment Using Fuzzy Logic. In:  
414 Chantre GR, González-Andujar JL, editors. *Decision Support Systems for Weed*  
415 *Management*. Switzerland: Springer Nature AG 2020. pp. 191-209.
- 416 7. Tilman D, Balzer C, Hill J, Befort BL (2011) Global food demand and the sustainable  
417 intensification of agriculture. *Proceedings of the National Academy of Sciences* 108:  
418 20260-20264.
- 419 8. Chantre E, Cardona A (2014) Trajectories of French Field Crop Farmers Moving Toward  
420 Sustainable Farming Practices: Change, Learning, and Links with the Advisory Services.  
421 *Agroecology and Sustainable Food Systems* 38: 573-602.
- 422 9. Ferraro DO, Benzi P (2015) A long-term sustainability assessment of an Argentinian agricultural  
423 system based on emergy synthesis. *Ecological Modelling* 306: 121-129.
- 424 10. Osteen CD, Szmedra PI (1989) *Agricultural pesticide use trends and policy issues: US*  
425 *Department of Agriculture, Economic Research Service*.

- 426 11. Cross P, Edwards-Jones G (2011) Variation in pesticide hazard from arable crop production in  
427 Great Britain from 1992 to 2008: An extended time-series analysis. *Crop Protection* 30:  
428 1579-1585.
- 429 12. Kniss AR (2017) Long-term trends in the intensity and relative toxicity of herbicide use. *Nature*  
430 *communications* 8: 1-7.
- 431 13. Feola G, Rahn E, Binder CR (2011) Suitability of pesticide risk indicators for less developed  
432 countries: a comparison. *Agriculture, ecosystems & environment* 142: 238-245.
- 433 14. Calliera M, Marchis A, Bollmohr S, Sacchetti G, Lamastra L, et al. (2013) A process to  
434 provide harmonised criteria for the selection of indicators for pesticide risk reduction within  
435 the framework of the sustainable use directive. *Pest management science* 69: 451-456.
- 436 15. Kniss AR, Coburn CW (2015) Quantitative evaluation of the environmental impact quotient  
437 (EIQ) for comparing herbicides. *PloS one* 10: e0131200.
- 438 16. Dushoff J, Caldwell B, Mohler CL (1994) Evaluating the environmental effect of pesticides: a  
439 critique of the environmental impact quotient. *American Entomologist* 40: 180-184.
- 440 17. Rajaram T, Das A (2010) Modeling of interactions among sustainability components of an agro-  
441 ecosystem using local knowledge through cognitive mapping and fuzzy inference system.  
442 *Expert Systems with Applications* 37: 1734-1744.
- 443 18. Ferraro DO, Ghersa CM, Sznajder GA (2003) Evaluation of environmental impact indicators  
444 using fuzzy logic to assess the mixed cropping systems of the Inland Pampa, Argentina.  
445 *Agriculture, Ecosystems & Environment* 96: 1-18.

- 446 19. Manuel-Navarrete D, Gallopín G, Blanco M, Diaz-Zorita M, Ferraro DO, et al. (2005) Systems  
447 analysis of agriculturization in the Argentine wet Pampas and its surrounding regions:  
448 sustainability, knowledge gaps, and policy integration. Santiago: ECLAC: Serie Medio  
449 Ambiente y Desarrollo 118, CEPAL. 63 p.
- 450 20. Arancibia F (2016) Regulatory Science and Social Movements: The Trial Against the Use of  
451 Pesticides in Argentina. *Theory in Action* 9.
- 452 21. Viglizzo EF, Ricard MF, Jobbágy EG, Frank FC, Carreño LV (2011) Assessing the cross-scale  
453 impact of 50 years of agricultural transformation in Argentina. *Field Crops Research* 124:  
454 186-194.
- 455 22. Kudsk P, Mathiassen SK (2020) Pesticide regulation in the European Union and the glyphosate  
456 controversy. *Weed Science* 68: 214-222.
- 457 23. Hall A, Rebella C, Ghersa C, Culot P (1992) Field-Crop Systems of the Pampas. In: Pearson CJ,  
458 editor. *Ecosystems of the World*. The Netherlands: Elsevier. pp. 413-449.
- 459 24. MinAgri (2018) Estimaciones agrícolas (Series of agricultural statistics by crop, year, province  
460 and department of the Argentine Republic). In: 2019] AawmgavA, editor.
- 461 25. Soriano A, León RJC, Sala OE, Lavado RS, Deregibus VA, et al. (1991) Río de la Plata  
462 grasslands. In: Coupland RT, editor. *Ecosystems of the world 8A Natural grasslands*  
463 Introduction and western hemisphere. New York: Elsevier. pp. 367-407.

- 464 26. Manuel-Navarrete D, Gallopín G, Blanco M, Díaz-Zorita M, Ferraro D, et al. (2009) Multi-  
465 causal and integrated assessment of sustainability: the case of agriculturization in the  
466 Argentine Pampas. *Environment, Development and Sustainability* 11: 612-638.
- 467 27. Lal R, Follett RF, Kimble J, Cole CV (1999) Managing U.S. cropland to sequester carbon in  
468 soil. *Journal of Soil and Water Conservation* 54: 374-381.
- 469 28. Trigo E, Cap E (2003) The impact of the introduction of transgenic crops in Argentinean  
470 agriculture. *AgBioForum* 6: 87-94.
- 471 29. Burachik M (2010) Experience from use of GMOs in Argentinian agriculture, economy and  
472 environment. *New biotechnology* 27: 588-592.
- 473 30. Zadeh LA (1965) Fuzzy sets. *Information and Control* 8: 338.
- 474 31. Norton SB, Rodier DJ, van der Schalie WH, Wood WP, Slimak MW, et al. (1992) A framework  
475 for ecological risk assessment at the EPA. *Environmental toxicology and chemistry* 11:  
476 1663-1672.
- 477 32. Newman M (2010) Acute and chronic lethal effects to individuals. In: Newman MC, editor.  
478 *Fundamentals of Ecotoxicology*. Chelsea, MI: Ann Arbor Press. pp. 247-272.
- 479 33. Rose DG (1998) *Environmental Toxicology: Current Developments*. Amsterdam, The  
480 Netherlands: Gordon and Breach Science Pub. 397 p.
- 481 34. Takagi T, Sugeno M (1985) Fuzzy identification of systems and its applications to modeling  
482 and control. *IEEE Transactions on Systems, Man, and Cybernetics* 15: 116.

- 483 35. AAPRESID (2019) Evolución de la superficie en Siembra Directa en Argentina.  
484 [superficien-en-SD.pdf](https://www.aapresid.org.ar/wp-content/uploads/2018/03/Estimacio%CC%81n-de-<br/>485 <a href=).
- 486 36. Peiretti R, Dumanski J (2014) The transformation of agriculture in Argentina through soil  
487 conservation. *International Soil and Water Conservation Research* 2: 14-20.
- 488 37. McLeod AI (2005) Kendall rank correlation and Mann-Kendall trend test. R Package Kendall.
- 489 38. Hansen JW (1996) Is agricultural sustainability a useful concept? *Agricultural Systems* 50: 117.
- 490 39. Mancini F, Woodcock BA, Isaac NJB (2019) Agrochemicals in the wild: Identifying links  
491 between pesticide use and declines of nontarget organisms. *Current Opinion in  
492 Environmental Science & Health* 11: 53-58.
- 493 40. Lewis KA, Tzilivakis J, Warner DJ, Green A (2016) An international database for pesticide risk  
494 assessments and management. *Human and Ecological Risk Assessment: An International  
495 Journal* 22: 1050-1064.
- 496 41. Smith C, McDonald G (1998) Assessing the sustainability of agriculture at the planning stage.  
497 *Journal of environmental management* 52: 15-37.
- 498 42. Thomson A, Ehiemere C, Carlson J, Matlock M, Barnes E, et al. (2020) Defining Sustainability  
499 as Measurable Improvement in the Environment: Lessons from a Supply Chain Program for  
500 Agriculture in the United States. In: Khaite PA, Erechchoukova MG, editors.  
501 *Sustainability Perspectives: Science, Policy and Practice: A Global View of Theories,*



502 Policies and Practice in Sustainable Development. Cham: Springer International Publishing.  
503 pp. 133-153.

504 43. Juraske R, Antón A, Castells F, Huijbregts MAJ (2007) PestScreen: A screening approach for  
505 scoring and ranking pesticides by their environmental and toxicological concern.  
506 Environment International 33: 886-893.

507 44. Benbrook CM (2012) Impacts of genetically engineered crops on pesticide use in the US--the  
508 first sixteen years. Environmental Sciences Europe 24: 24.

509 45. Möhring N, Gaba S, Finger R (2019) Quantity based indicators fail to identify extreme pesticide  
510 risks. Science of The Total Environment 646: 503-523.

511 46. Stoner KA, Eitzer BD (2013) Using a hazard quotient to evaluate pesticide residues detected in  
512 pollen trapped from honey bees (*Apis mellifera*) in Connecticut. PLoS One 8: e77550.

513 47. Kovach J, Petzoldt C, Degni J, Tette J (1992) A method to measure the environmental impact of  
514 pesticides. New York's Food Life Sci Bull 139: 1-8.

515 48. Roussel O, Cavelier A, van der Werf HMG (2000) Adaptation and use of a fuzzy expert system  
516 to assess the environmental effect of pesticides applied to field crops. Agriculture,  
517 Ecosystems and Environment 80: 143-158.

518 49. Ferraro DO (2009) Fuzzy knowledge-based model for soil condition assessment in Argentinean  
519 cropping systems. Environmental Modelling & Software 24: 359-370.

- 520 50. Acosta-Alba I, Van der Werf HM (2011) The use of reference values in indicator-based  
521 methods for the environmental assessment of agricultural systems. *Sustainability* 3: 424-  
522 442.
- 523 51. Konradsen F, van der Hoek W, Cole DC, Hutchinson G, Daisley H, et al. (2003) Reducing acute  
524 poisoning in developing countries—options for restricting the availability of pesticides.  
525 *Toxicology* 192: 249-261.
- 526 52. SENASA (2011) Servicio Nacional de Sanidad y Calidad Agroalimentaria. Resolución  
527 511/2011. Available in: <https://www.senasagobar/>.
- 528 53. Iturburu FG, Calderon G, Amé MV, Menone ML (2019) Ecological Risk Assessment (ERA) of  
529 pesticides from freshwater ecosystems in the Pampas region of Argentina: Legacy and  
530 current use chemicals contribution. *Science of The Total Environment* 691: 476-482.
- 531 54. SENASA (2018) Registro nacional de terpeutica vegetal (National registry of vegetal  
532 therapeutics). 2018 ed. Buenos Aires, Argentina.
- 533 55. Racovita M, Obonyo DN, Craig W, Ripandelli D (2015) What are the non-food impacts of GM  
534 crop cultivation on farmers' health? *Environmental Evidence* 4: 17.
- 535 56. Blanco CA, Chiaravalle W, Dalla-Rizza M, Farias JR, García-Degano MF, et al. (2016) Current  
536 situation of pests targeted by Bt crops in Latin America. *Current Opinion in Insect Science*  
537 15: 131-138.

- 538 57. Ferraro DO, Ghersa CM (2013) Fuzzy assessment of herbicide resistance risk: Glyphosate-  
539 resistant johnsongrass, *Sorghum halepense* (L.) Pers., in Argentina's croplands. *Crop*  
540 *Protection* 51: 32-39.
- 541 58. Valverde BE, Gressel J (2006) Dealing with the evolution and spread of *Sorghum halepense*  
542 glyphosate resistance in Argentina. Buenos Aires: Consultancy report to SENASA.  
543 Available: <http://www.sinavimo.gov.ar/files/senasareport2006.pdf>.
- 544 59. Rubione C, Ward SM (2017) A New Approach to Weed Management to Mitigate Herbicide  
545 Resistance in Argentina. *Weed Science* 64: 641-648.
- 546 60. de Abelleira D, Verón S (2020) Crop rotations in the Rolling Pampas: Characterization, spatial  
547 pattern and its potential controls. *Remote Sensing Applications: Society and Environment*:  
548 100320.
- 549 61. Ferraro DO, Gagliostro M (2017) Trade-off assessments between environmental and economic  
550 indicators in cropping systems of Pampa region (Argentina). *Ecological Indicators* 83: 328-  
551 337.
- 552 62. Caiado RGG, de Freitas Dias R, Mattos LV, Quelhas OLG, Leal Filho W (2017) Towards  
553 sustainable development through the perspective of eco-efficiency - A systematic literature  
554 review. *Journal of Cleaner Production* 165: 890-904.  
555

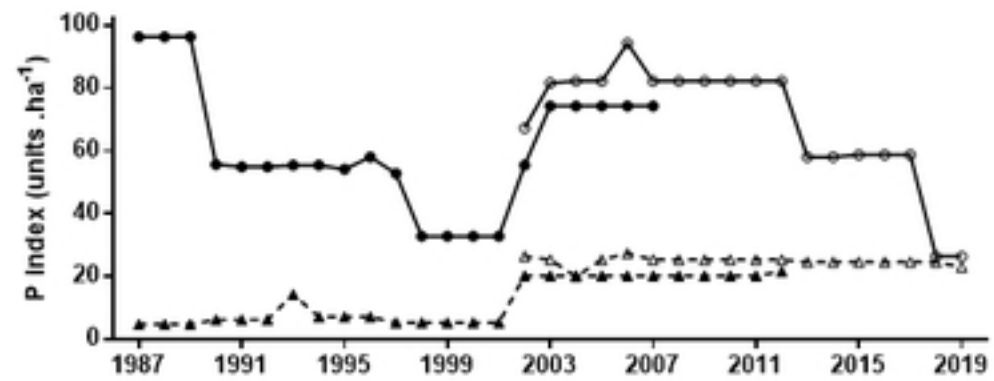

Figure 1

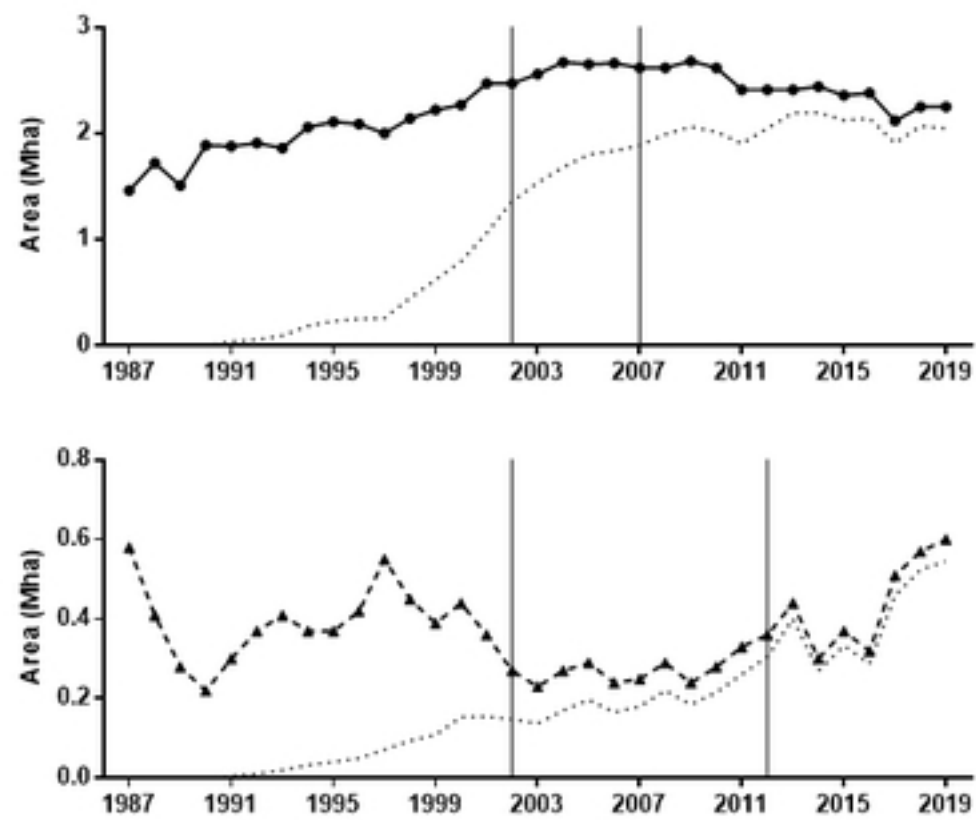

Figure 2

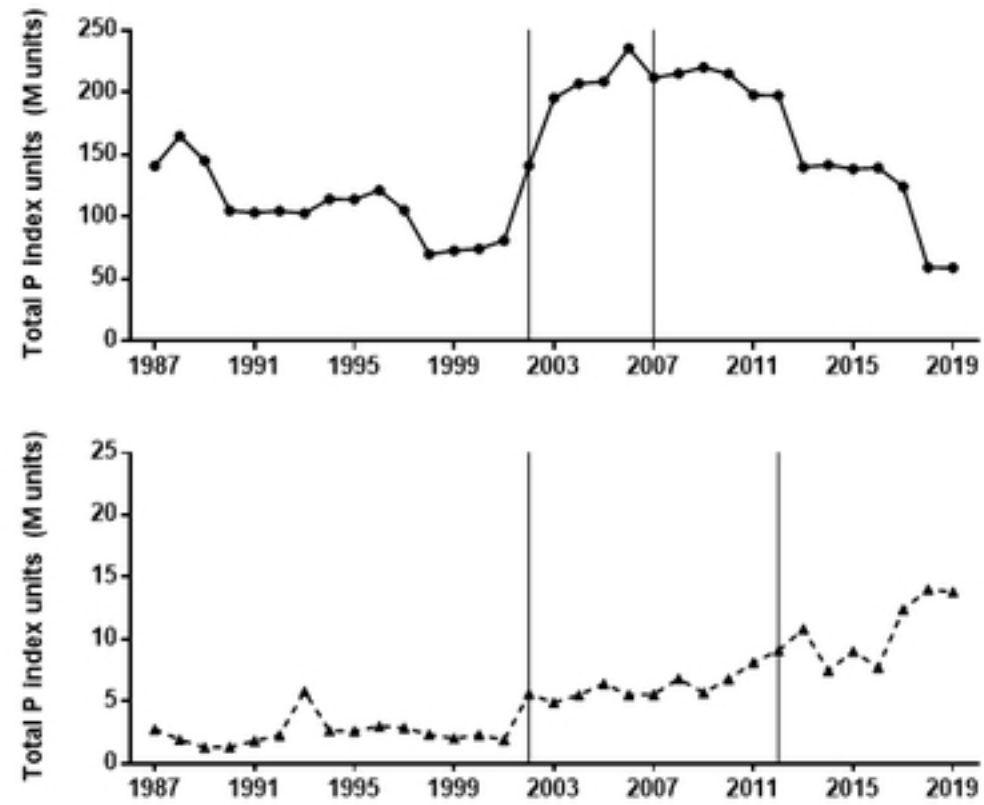

Figure 3

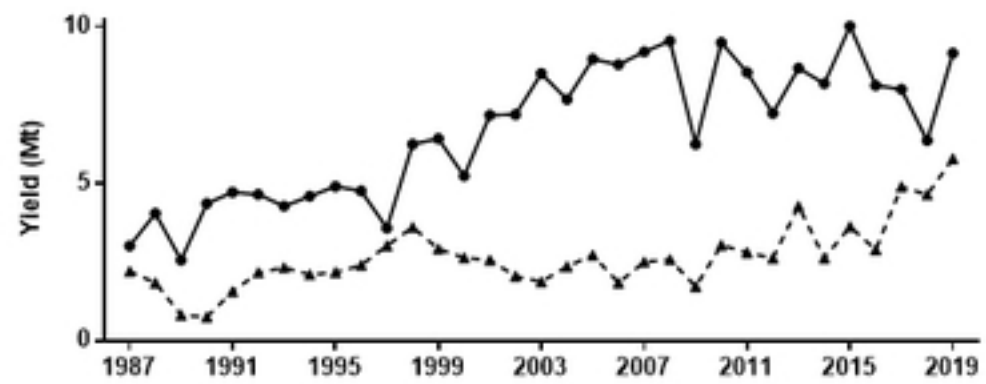

Figure 4

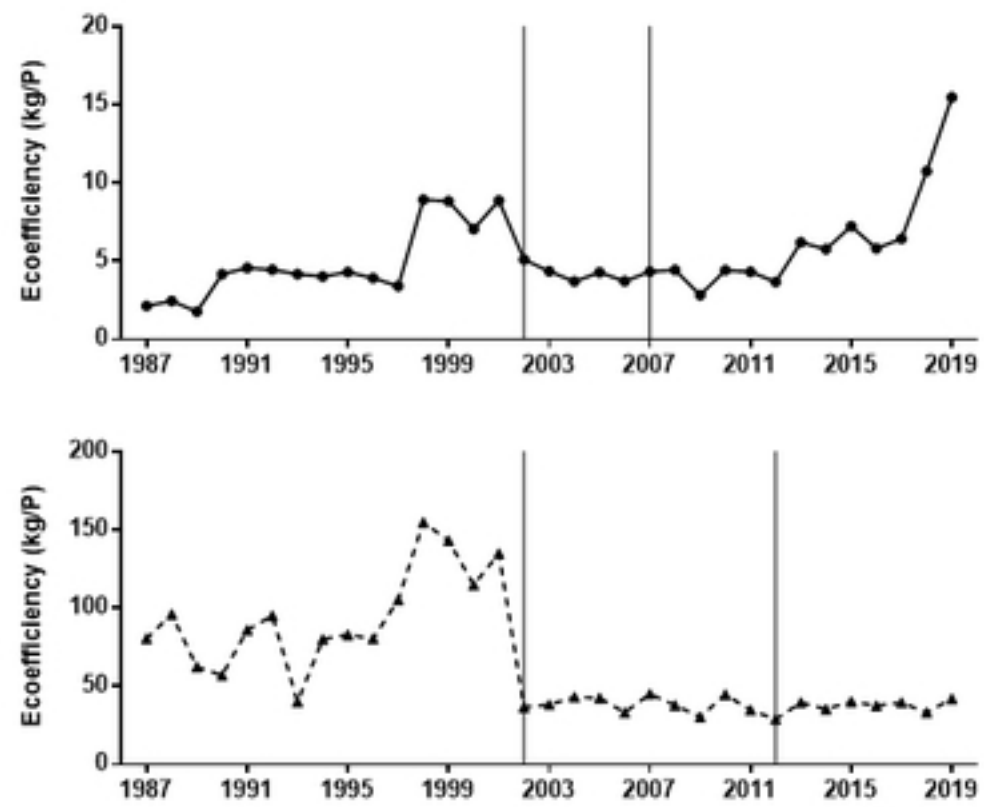

Figure 5



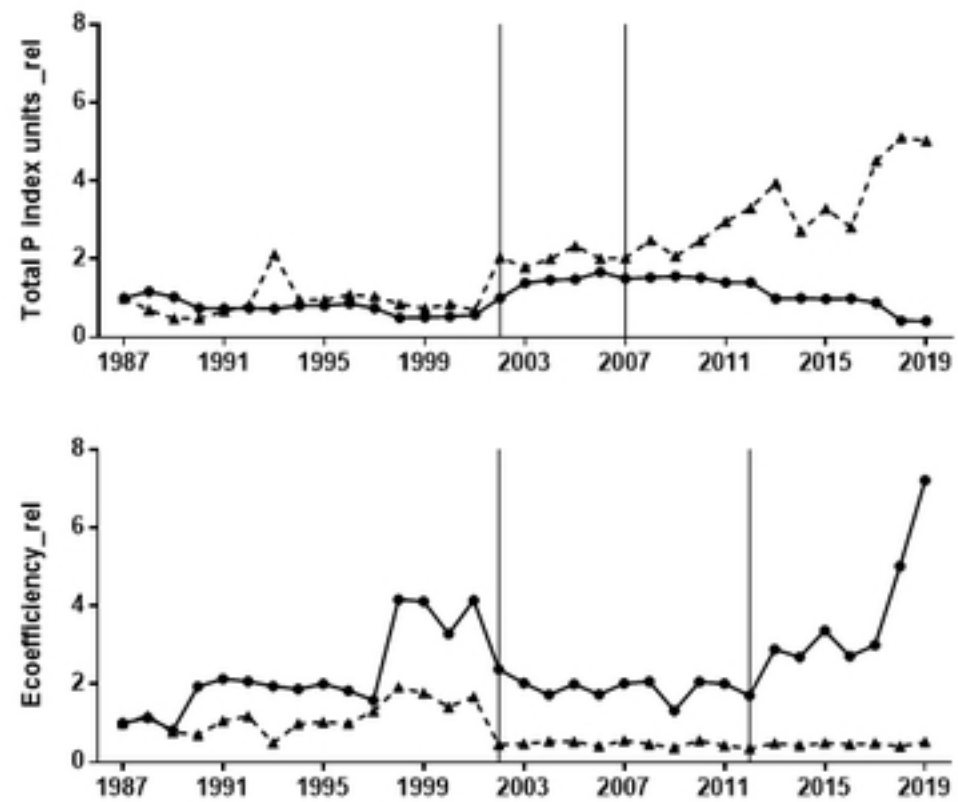

Figure 6
